# Supplementary material for: Dual recognition of Al3+ and Zn2+ ions by a novel probe based on diarylethene and its application
Source: Royal Society of Chemistry journal article supplement (doi:10.1039/c9ra05652a), 2019-01-01
Supplement: c9ra05652a1.pdf [file c9ra05652a1.pdf]

**Fig. S1.**  $^1\text{H}$  NMR spectra (400 MHz) of **10** measured in  $\text{DMSO-}d_6$ .

**Fig. S2.**  $^{13}\text{C}$  NMR spectra (100 MHz) of **10** measured in  $\text{DMSO-}d_6$ .

**Fig. S3.** (A) Job's plot showing the 1:1 complex between  $\text{Al}^{3+}$  and **10**; (B) Job's plot showing the 1:1 complex between  $\text{Zn}^{2+}$  and **10**.

**Fig. S4.** The limit of detection (LOD) and Hildebrand-Benesi plot for **10** in methanol ( $2.0 \times 10^{-5}$  mol  $\text{L}^{-1}$ ): (A) Hildebrand-Benesi plot based on the 1:1 for **10**, the association constant of **10** with  $\text{Al}^{3+}$  was calculated to be  $2.7 \times 10^4$   $\text{L}\cdot\text{mol}^{-1}$ ; (B) Hildebrand-Benesi plot based on the 1:1 for **10**, the association constant of **10** with  $\text{Zn}^{2+}$  was calculated to be  $1.98 \times 10^5$   $\text{L}\cdot\text{mol}^{-1}$ ; (C) LOD for  $\text{Al}^{3+}$  was  $6.7 \times 10^{-9}$  mol  $\text{L}^{-1}$ . (D) LOD for  $\text{Zn}^{2+}$  was  $3.7 \times 10^{-8}$  mol  $\text{L}^{-1}$ .

**Fig. S5** (A) Mass spectra showing the 1:1 complex of **10** and  $\text{Al}^{3+}/\text{Zn}^{2+}$ : the mass spectra of **10'** and **10''**.

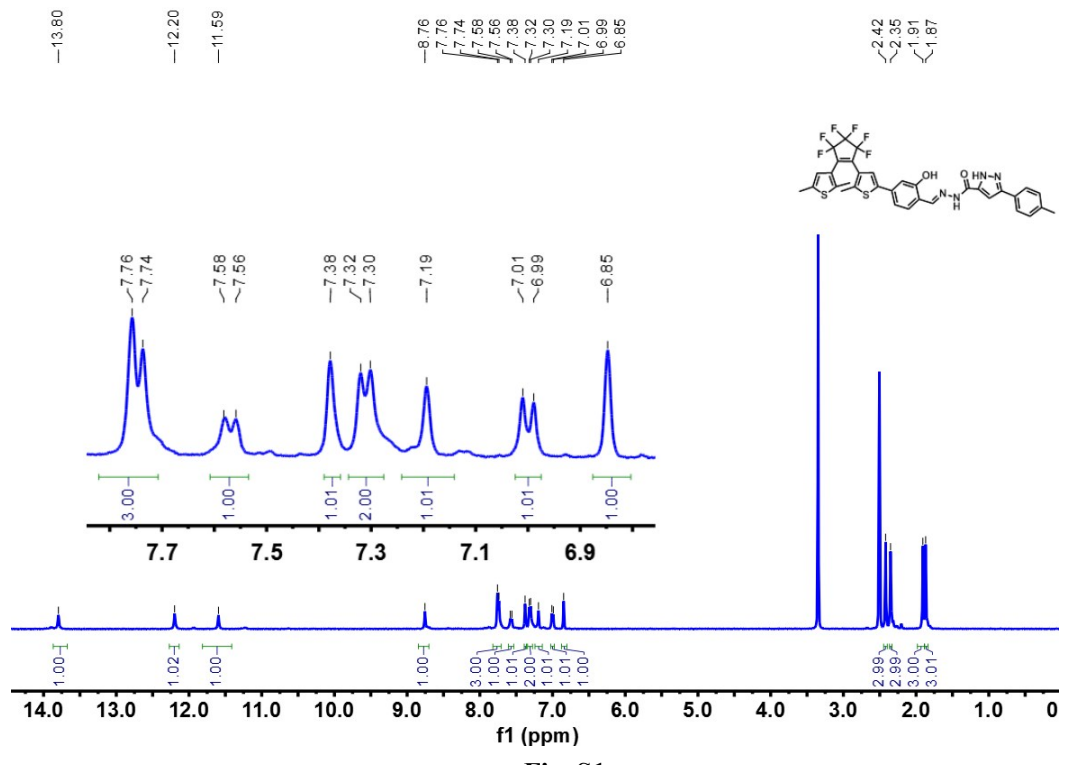

Fig. S1

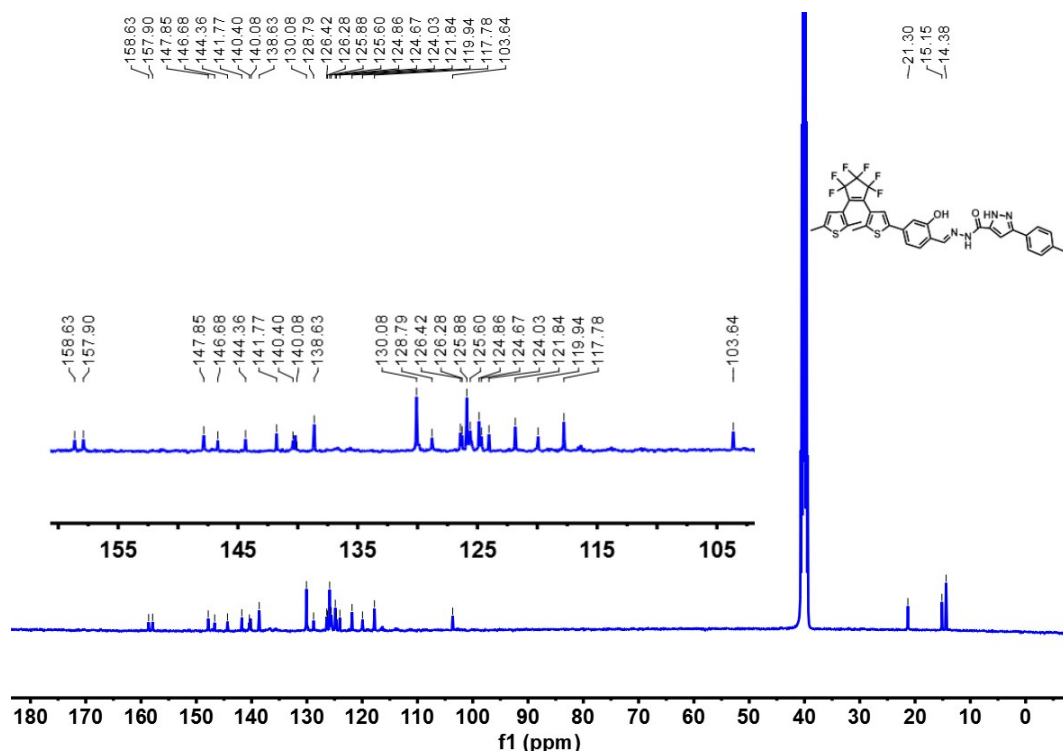

Fig. S2

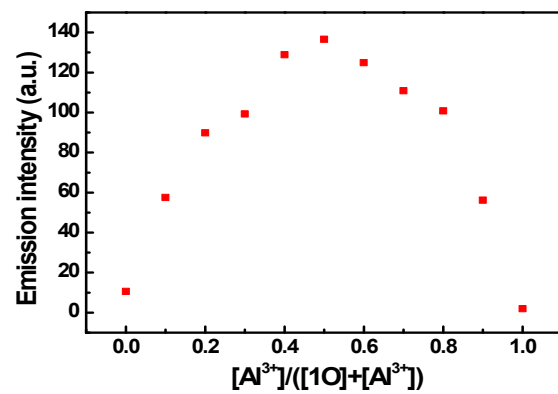

(A)

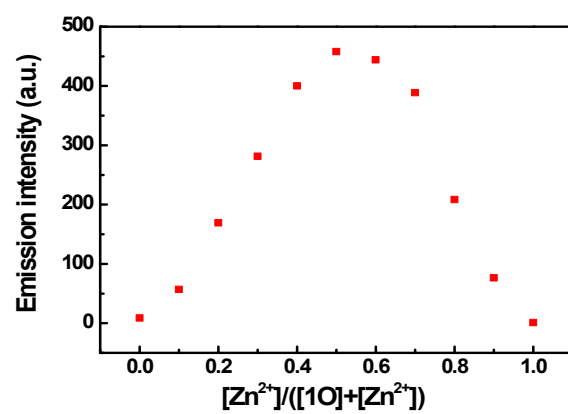

(B)

Fig. S3

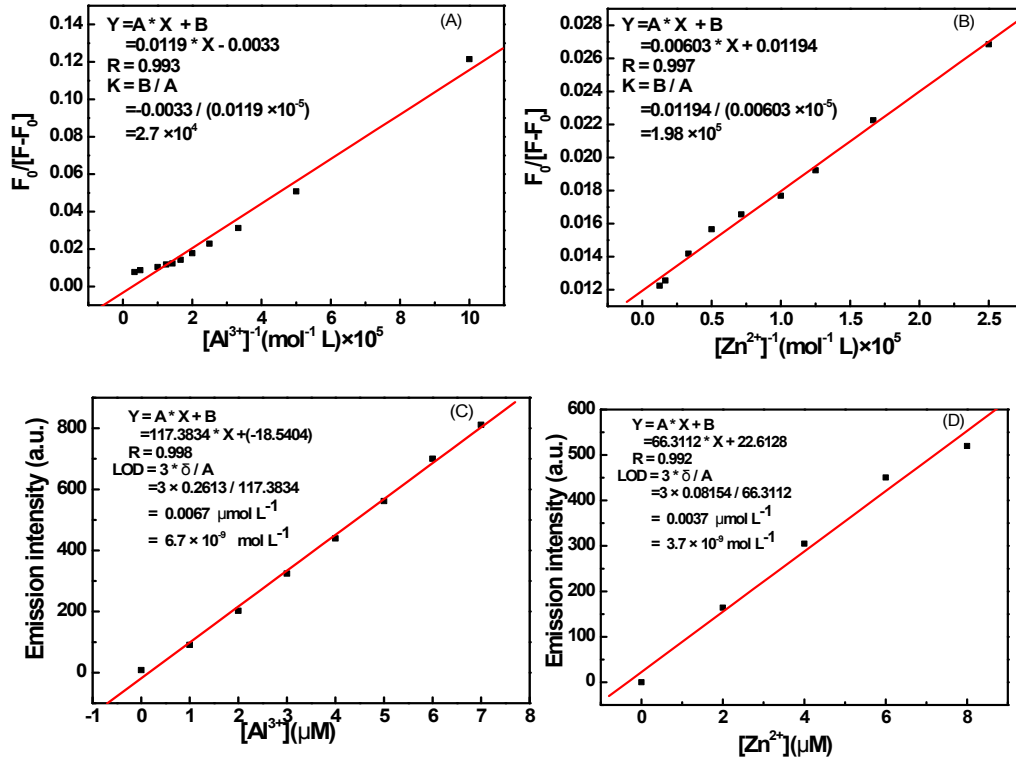

Fig. S4

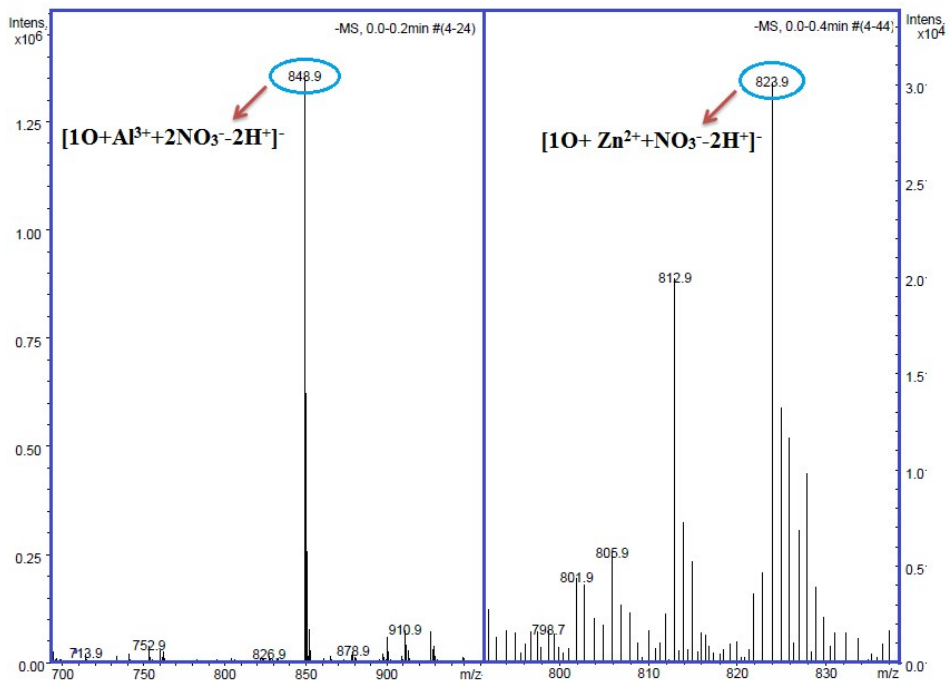

**Fig. S5**
